# Supplementary material for: Design and Construction Risks for a Shipping Port and Container Terminal: Case Study
Source: Atypon-hosted journal article supplement (doi:10.1061/(asce)ww.1943-5460.0000537), 2019-10-31
Supplement: supplemental_data_ww.1943-5460.0000537_joubert.pdf [file supplemental_data_ww.1943-5460.0000537_joubert.pdf]

## SUPPLEMENTAL DATA

*ASCE Journal of Waterway, Port, Coastal, and Ocean Engineering*

# Design and Construction Risks for a Shipping Port and Container Terminal: Case Study

F.J. Joubert and L. Pretorius

**DOI:** 10.1061/(ASCE)WW.1943-5460.0000537

© ASCE 2019

[www.ascelibrary.org](http://www.ascelibrary.org)

**Table S1.** Shipping Port and Container Terminal: Specific Design and Construction risks

| Level 1 & Level 2              | Level 3: Risk category                            | Level 4: Individual risks                                                                                                                                                                                                                                                                                                                                                                                                                                                                                                                 |
|--------------------------------|---------------------------------------------------|-------------------------------------------------------------------------------------------------------------------------------------------------------------------------------------------------------------------------------------------------------------------------------------------------------------------------------------------------------------------------------------------------------------------------------------------------------------------------------------------------------------------------------------------|
| Breakwater: Design risks       | Specification compliance                          | <ul style="list-style-type: none"> <li>• Additional design measures required to treat long wave action</li> <li>• Concrete Armour Unit specification compliance</li> <li>• Severe long-term beach erosion due to port layout and design</li> </ul>                                                                                                                                                                                                                                                                                        |
|                                | Completion delays                                 | <ul style="list-style-type: none"> <li>• Delayed geotechnical and bathymetric surveys</li> </ul>                                                                                                                                                                                                                                                                                                                                                                                                                                          |
| Breakwater: Construction risks | Placement of rock by split barges, trucks, cranes | <ul style="list-style-type: none"> <li>• Delays during construction of beach crossing</li> <li>• Deterioration of armour stone rock during handling</li> <li>• Excessive loss of material during rock placement</li> <li>• Traffic congestion on breakwater</li> <li>• Rock loading onto split barges bottlenecks</li> <li>• Rock placing delays by cranes on breakwater</li> <li>• Temporary jetty out of operation (weather / maintenance issues / damages by vessels)</li> <li>• Offshore barge working problems and delays</li> </ul> |
|                                | Concrete armour units                             | <ul style="list-style-type: none"> <li>• Concrete Armour Unit production delays</li> <li>• Concrete Armour Unit placement delays</li> </ul>                                                                                                                                                                                                                                                                                                                                                                                               |
|                                | Natural environment                               | <ul style="list-style-type: none"> <li>• Overtopping of breakwater during construction</li> <li>• Rock core damaged / exposed after severe storms</li> <li>• Insurance claims not paid due to concrete armour units not in place to protect breakwater</li> <li>• Settlement of the breakwater requiring more rock</li> <li>• Sea bed changes during construction (siltation)</li> </ul>                                                                                                                                                  |
| Health, Safety and Environment |                                                   | <p>Marine operational risks:</p> <ul style="list-style-type: none"> <li>• Fire at sea</li> <li>• Wildlife - sharks</li> <li>• Vessel collision incidents</li> <li>• Damage of dredger and other vessels during storms</li> <li>• Vessels grounding</li> <li>• Storm warning procedure not in place</li> <li>• Safe human accessibility of marine plant</li> </ul>                                                                                                                                                                         |

|                                            |                                                  |                                                                                                                                                                                                                                                                                                                                                                                                                                                                                          |
|--------------------------------------------|--------------------------------------------------|------------------------------------------------------------------------------------------------------------------------------------------------------------------------------------------------------------------------------------------------------------------------------------------------------------------------------------------------------------------------------------------------------------------------------------------------------------------------------------------|
| Reclaimed land: Design risks               | Site conditions                                  | <ul style="list-style-type: none"> <li>Existing shoreline / underestimation of work to prepare the project site</li> </ul>                                                                                                                                                                                                                                                                                                                                                               |
| Reclaimed land: Construction risks         | Dredging of reclaim material                     | <ul style="list-style-type: none"> <li>Dredging permitting and approval delays</li> <li>Dredging starts late (dredger not available)</li> <li>Dredger production rates lower than expected</li> <li>Sand Borrow royalties exceeding budget</li> <li>Sand location further than planned</li> <li>Heritage finds under water</li> <li>Damages to existing underwater pipelines and communication cables</li> <li>Disruption of commercial shipping lanes by dredging activities</li> </ul> |
|                                            | Discharge or reclaimed material                  | <ul style="list-style-type: none"> <li>Bund wall collapsing</li> <li>Bund weir overflow</li> </ul>                                                                                                                                                                                                                                                                                                                                                                                       |
|                                            | Health, Safety and Environment                   | <ul style="list-style-type: none"> <li>Turbidity caused by dredging exceeding approval limits</li> <li>Dredger damaged by debris/wrecks</li> </ul>                                                                                                                                                                                                                                                                                                                                       |
| Entrance canal & basin: Design risks       | Design                                           | <ul style="list-style-type: none"> <li>Dredging depth disagreement</li> <li>Dredging volume uncertainty</li> <li>Navigational aid specifications unclear / late</li> </ul>                                                                                                                                                                                                                                                                                                               |
| Entrance canal & basin: Construction risks | Dredging of sand and rock                        | <ul style="list-style-type: none"> <li>Over dredging (outside specification)</li> <li>Cutter Suction dredger required and not available</li> </ul>                                                                                                                                                                                                                                                                                                                                       |
|                                            | Natural environment                              | <ul style="list-style-type: none"> <li>Seabed changes (siltation)</li> <li>Harder rock which require underwater blasting</li> </ul>                                                                                                                                                                                                                                                                                                                                                      |
| Quay wall: Design risks                    | Design                                           | <ul style="list-style-type: none"> <li>Stability in design / Movement of quay wall</li> <li>Sea bed changes requiring design changes</li> <li>Efficiency of concrete plug between caissons</li> </ul>                                                                                                                                                                                                                                                                                    |
| Quay wall: Construction risks              | Fabrication of caissons                          | <ul style="list-style-type: none"> <li>Late start of casting of caissons</li> <li>Suitability of ordered caisson formwork</li> <li>Caisson concrete mix design confirmation delays</li> <li>Caisson casting quality</li> <li>Caisson production rates</li> </ul>                                                                                                                                                                                                                         |
|                                            | Dredging and preparation of the quay wall trench | <ul style="list-style-type: none"> <li>Trench levelling machine late</li> <li>Trench tamping &amp; levelling quality problems</li> <li>Dredging of quay wall trench starts late</li> <li>Dredging of quay wall trench taking longer than planned</li> </ul>                                                                                                                                                                                                                              |

|                                                     |                                         |                                                                                                                                                                                                                                                                                                                                                                                                                                                                                                                                                                                                                                                    |
|-----------------------------------------------------|-----------------------------------------|----------------------------------------------------------------------------------------------------------------------------------------------------------------------------------------------------------------------------------------------------------------------------------------------------------------------------------------------------------------------------------------------------------------------------------------------------------------------------------------------------------------------------------------------------------------------------------------------------------------------------------------------------|
|                                                     | Placement of caissons                   | <ul style="list-style-type: none"> <li>• Caissons semi-submersible barge not on site in time</li> <li>• Caisson semi-submersible barge stability during loading</li> <li>• Quay trench filled by sand from reclamation activities</li> <li>• Caisson loading delays onto semi-submersible barge</li> <li>• Caissons abortive work / placed caisson needs to be re-positioned</li> <li>• Caisson placement delays at sea (wave action / inclement weather)</li> <li>• Caisson settlement and displacement</li> <li>• Caisson backfilling quality</li> <li>• Quay wall stability after dredging</li> <li>• Late completion of break water</li> </ul> |
|                                                     | Geotextile                              | <ul style="list-style-type: none"> <li>• Backfill geotextile specification and placement method</li> <li>• Damages to geotextile during piling</li> </ul>                                                                                                                                                                                                                                                                                                                                                                                                                                                                                          |
|                                                     | Capping beam                            | <ul style="list-style-type: none"> <li>• Position of cast-in items</li> </ul>                                                                                                                                                                                                                                                                                                                                                                                                                                                                                                                                                                      |
|                                                     | Health, Safety and Environment          | <ul style="list-style-type: none"> <li>• Caisson crane accidents</li> <li>• Safety supervision during moving of caissons</li> </ul> <p>Additional marine risk:</p> <ul style="list-style-type: none"> <li>• Ship-to-shore crane delivery ship draught too deep</li> </ul>                                                                                                                                                                                                                                                                                                                                                                          |
| Container yard and buildings:<br>Design risks       | Scope definition                        | <ul style="list-style-type: none"> <li>• Container terminal design assumptions</li> <li>• Late design changes by client and port authorities</li> <li>• Military / coast guard requirements and approvals</li> </ul>                                                                                                                                                                                                                                                                                                                                                                                                                               |
|                                                     | Design interfaces                       | <ul style="list-style-type: none"> <li>• Pavement storm water pipe alignment with quay wall design</li> <li>• Rear crane beam / Services alignment</li> <li>• Ship to shore crane power supply turnover pits alignment</li> </ul>                                                                                                                                                                                                                                                                                                                                                                                                                  |
| Container yard and buildings:<br>Construction risks | Commissioning and operational readiness | <ul style="list-style-type: none"> <li>• Ship-to-shore cranes late</li> <li>• Construction and container traffic interaction during commissioning (port will go-live when construction is not complete)</li> </ul>                                                                                                                                                                                                                                                                                                                                                                                                                                 |
